# Supplementary material for: Inhibition of antiapoptotic BCL-2 proteins with ABT-263 induces fibroblast apoptosis, reversing persistent pulmonary fibrosis
Source: JCI Insight. 2023 Feb 8;8(3):e163762. doi: 10.1172/jci.insight.163762 (PMC9977433; doi:10.1172/jci.insight.163762)
Supplement: Supplemental data [file jciinsight-8-163762-s095.pdf]

| Characteristics           | Healthy<br>(n=5) | IPF<br>(n=8) | Silicosis<br>(n=8)* |
|---------------------------|------------------|--------------|---------------------|
| Male sex, n (%)           | 2 (40%)          | 5 (62.5%)    | 8 (100%)            |
| Age, yr, mean<br>+/- SD   | 63+/- 10.5       | 59 +/- 9.8   | 65 +/- 6.8          |
| Age Distribution<br>n (%) |                  |              |                     |
| 40 to <50                 | 1 (20%)          | 2 (25%)      |                     |
| 50 to <60                 | 0 (0%)           | 2 (25%)      | 1 (12.5%)           |
| 60 to <70                 | 3 (60%)          | 4 (50%)      | 4 (50%)             |
| 70 to <80                 | 1 (20%)          | 0 (0%)       | 2 (25%)             |
| N/A**                     | 0 (0%)           | 0 (0%)       | 1 (12.5%)           |

**Supplemental Table 1.** Demographic data for immunofluorescent staining samples

\*Samples from 4 patients were stained for each BCL-2 family member. \*\*One silicosis patient's age was unidentifiable.

| Characteristics        | Healthy<br>(n=3) | IPF<br>(n=3) |
|------------------------|------------------|--------------|
| Male sex, n (%)        | 3 (100%)         | 1 (33%)      |
| Age, yr, mean +/- SD   | 57+/- 4.5        | 70 +/- 4.5   |
| Age Distribution n (%) |                  |              |
| 50 to <60              | 2 (67%)          | 0 (0%)       |
| 60 to <70              | 1 (33%)          | 1 (33%)      |
| 70 to <80              | 0 (0%)           | 2 (67%)      |

**Supplemental Table 2.** Precision cut lung slice donor demographic data

| GO biological process                                                         | Expected Value | Fold Enrichment | +/- | P value  |
|-------------------------------------------------------------------------------|----------------|-----------------|-----|----------|
| Methylglyoxal metabolic process                                               | 0.04           | 92.81           | +   | 4.69E-03 |
| L-phenylalanine catabolic process                                             | 0.06           | 69.61           | +   | 1.09E-02 |
| Erythrose 4-phosphate/phosphoenolpyruvate family amino acid catabolic process | 0.06           | 69.61           | +   | 1.09E-02 |
| L-phenylalanine metabolic process                                             | 0.07           | 55.69           | +   | 2.19E-02 |
| Fructose metabolic process                                                    | 0.09           | 53.55           | +   | 1.28E-03 |
| Aldehyde catabolic process                                                    | 0.11           | 46.41           | +   | 2.28E-03 |
| Canonical glycolysis                                                          | 0.11           | 43.51           | +   | 2.98E-03 |
| Glucose catabolic process to pyruvate                                         | 0.11           | 43.51           | +   | 2.98E-03 |
| NADH regeneration                                                             | 0.11           | 43.51           | +   | 2.98E-03 |
| Blood coagulation, fibrin clot formation                                      | 0.14           | 41.77           | +   | 2.27E-04 |
| Glycolytic process through glucose-6-phosphate                                | 0.14           | 36.64           | +   | 6.11E-03 |
| Alditol metabolic process                                                     | 0.17           | 36.32           | +   | 4.60E-04 |
| Monosaccharide biosynthetic process                                           | 0.31           | 35.61           | +   | 1.16E-09 |
| Glucose catabolic process                                                     | 0.14           | 34.81           | +   | 7.60E-03 |
| NAD metabolic process                                                         | 0.2            | 34.81           | +   | 4.33E-05 |
| Hexose biosynthetic process                                                   | 0.26           | 34.81           | +   | 2.50E-07 |
| Protein activation cascade                                                    | 0.18           | 33.41           | +   | 7.04E-04 |
| Glycolytic process through fructose-6-phosphate                               | 0.15           | 33.15           | +   | 9.35E-03 |
| Gluconeogenesis                                                               | 0.23           | 30.45           | +   | 9.67E-05 |
| NADH metabolic process                                                        | 0.25           | 27.84           | +   | 1.67E-04 |
| Cellular aldehyde metabolic process                                           | 0.4            | 27.35           | +   | 1.44E-08 |
| Purine ribonucleoside metabolic process                                       | 0.19           | 25.78           | +   | 2.77E-02 |
| Response to copper ion                                                        | 0.2            | 24.86           | +   | 3.24E-02 |
| Cellular detoxification                                                       | 0.27           | 21.98           | +   | 6.26E-03 |
| Cellular response to toxic substance                                          | 0.32           | 18.56           | +   | 1.53E-02 |
| Glutathione metabolic process                                                 | 0.57           | 17.62           | +   | 7.43E-06 |
| Detoxification                                                                | 0.4            | 17.4            | +   | 3.01E-03 |
| Blood coagulation                                                             | 0.85           | 16.52           | +   | 6.04E-09 |
| Alpha-amino acid catabolic process                                            | 0.55           | 16.49           | +   | 9.12E-05 |
| Regulation of plasma lipoprotein particle levels                              | 0.37           | 16.38           | +   | 2.98E-02 |
| Hemostasis                                                                    | 0.86           | 16.24           | +   | 7.45E-09 |
| Monosaccharide metabolic process                                              | 1.17           | 15.37           | +   | 8.25E-12 |
| Hexose metabolic process                                                      | 1.05           | 15.26           | +   | 3.93E-10 |
| Primary alcohol metabolic process                                             | 0.56           | 14.28           | +   | 1.72E-03 |
| Pyruvate metabolic process                                                    | 0.5            | 14.12           | +   | 1.10E-02 |
| Cellular amino acid catabolic process                                         | 0.67           | 13.47           | +   | 4.58E-04 |
| Negative regulation of endopeptidase activity                                 | 1.34           | 13.47           | +   | 6.85E-11 |
| Cellular modified amino acid metabolic process                                | 1.38           | 13.05           | +   | 1.14E-10 |
| Cellular ketone metabolic process                                             | 0.62           | 12.95           | +   | 3.44E-03 |
| Negative regulation of peptidase activity                                     | 1.87           | 12.27           | +   | 6.51E-14 |

|                                                 |       |       |   |          |
|-------------------------------------------------|-------|-------|---|----------|
| Cholesterol homeostasis                         | 0.69  | 11.6  | + | 7.49E-03 |
| Sterol homeostasis                              | 0.7   | 11.48 | + | 8.06E-03 |
| Polyol metabolic process                        | 0.73  | 11.03 | + | 1.07E-02 |
| Alcohol metabolic process                       | 2.21  | 10.88 | + | 1.52E-13 |
| Response to toxic substance                     | 0.87  | 10.36 | + | 3.71E-03 |
| Negative regulation of hydrolase activity       | 2.62  | 10.3  | + | 4.53E-15 |
| Secondary alcohol metabolic process             | 0.98  | 10.16 | + | 9.75E-04 |
| Cholesterol metabolic process                   | 0.89  | 10.1  | + | 4.51E-03 |
| Carboxylic acid catabolic process               | 1.42  | 9.84  | + | 3.71E-06 |
| Organic acid catabolic process                  | 1.44  | 9.75  | + | 4.20E-06 |
| Negative regulation of proteolysis              | 2.59  | 9.67  | + | 4.17E-13 |
| Organic hydroxy compound transport              | 1.06  | 9.47  | + | 1.81E-03 |
| Sterol metabolic process                        | 0.96  | 9.42  | + | 7.83E-03 |
| Cellular carbohydrate metabolic process         | 1.06  | 9.41  | + | 1.92E-03 |
| Regulation of cellular ketone metabolic process | 1.1   | 8.19  | + | 2.35E-02 |
| Regulation of peptidase activity                | 3.18  | 8.17  | + | 4.28E-12 |
| Regulation of lipid biosynthetic process        | 1.47  | 8.15  | + | 5.01E-04 |
| Response to reactive oxygen species             | 1.13  | 7.98  | + | 2.87E-02 |
| Wound healing                                   | 1.9   | 7.88  | + | 1.56E-05 |
| Sulfur compound metabolic process               | 2.29  | 7.86  | + | 3.51E-07 |
| Regulation of endopeptidase activity            | 2.57  | 7.78  | + | 3.16E-08 |
| Regulation of lipid localization                | 1.34  | 7.49  | + | 1.39E-02 |
| Positive regulation of lipid metabolic process  | 1.35  | 7.41  | + | 1.52E-02 |
| Regulation of small molecule metabolic process  | 2.66  | 6.4   | + | 2.50E-05 |
| Steroid metabolic process                       | 1.94  | 6.19  | + | 8.40E-03 |
| Response to oxidative stress                    | 2.47  | 5.67  | + | 2.80E-03 |
| Response to metal ion                           | 2.13  | 5.64  | + | 2.11E-02 |
| Small molecule metabolic process                | 10.9  | 5.59  | + | 1.41E-25 |
| Response to inorganic substance                 | 3.31  | 5.44  | + | 9.55E-05 |
| Regulation of lipid metabolic process           | 2.77  | 5.41  | + | 1.83E-03 |
| Response to hormone                             | 4.25  | 4.48  | + | 7.20E-04 |
| Cellular amide metabolic process                | 5.45  | 4.04  | + | 3.70E-04 |
| Cellular lipid metabolic process                | 6.51  | 3.22  | + | 2.70E-02 |
| Response to oxygen-containing compound          | 9.85  | 3.15  | + | 1.39E-04 |
| Response to organic substance                   | 18.75 | 2.13  | + | 2.93E-02 |
| Organic substance metabolic process             | 53.01 | 1.96  | + | 2.65E-12 |
| Cellular metabolic process                      | 47.88 | 1.8   | + | 4.69E-06 |
| Response to stimulus                            | 62.42 | 1.51  | + | 4.46E-03 |

| GO cellular component complete    | Expected Value | Fold Enrichment | +/- | P value  |
|-----------------------------------|----------------|-----------------|-----|----------|
| Serine-type endopeptidase complex | 0.14           | 29.31           | +   | 3.09E-02 |
| Serine-type peptidase complex     | 0.14           | 29.31           | +   | 3.09E-02 |
| High-density lipoprotein particle | 0.27           | 18.81           | +   | 1.86E-02 |
| Plasma lipoprotein particle       | 0.33           | 15.13           | +   | 4.87E-02 |
| Lipoprotein particle              | 0.33           | 15.13           | +   | 4.87E-02 |
| Myelin sheath                     | 1.54           | 7.12            | +   | 1.10E-03 |

|                                          |       |      |   |          |
|------------------------------------------|-------|------|---|----------|
| Collagen-containing extracellular matrix | 2.84  | 7.03 | + | 3.02E-08 |
| Extracellular matrix                     | 3.79  | 5.28 | + | 3.66E-06 |
| External encapsulating structure         | 3.8   | 5.26 | + | 3.89E-06 |
| Extracellular space                      | 15.31 | 4.96 | + | 2.06E-31 |
| Extracellular region                     | 20.65 | 4.02 | + | 9.12E-29 |
| Cytosol                                  | 27.91 | 2.22 | + | 3.00E-07 |
| Intrinsic component of membrane          | 44.01 | 0.27 | - | 4.77E-07 |
| Integral component of membrane           | 42.72 | 0.26 | - | 5.18E-07 |

**Supplemental Table 3.** Enrichment of GO biological processes and GO cellular components from mass spectrometric analysis of serum from repetitive bleomycin mice treated with vehicle or ABT-263.

| Name            | Sequence (5'-3')                                             | Strand   |
|-----------------|--------------------------------------------------------------|----------|
| <b>Bcl2I1</b>   | 5'-/56-FAM/CACAGAGCA/ZEN/GACCCAGTAAGTGAGC/31ABkFQ/-3'        | Probe    |
| <b>(Bcl-xl)</b> | 5'-ATTCAGCACGAGCAGTCAG-3'                                    | Primer 1 |
|                 | 5'-CTCAACCAGTCCATTGTCCAA-3'                                  | Primer 2 |
| <b>Bcl2I11</b>  | 5'-/56-FAM/CCAAGCAAC/ZEN/CTTCTGATGT AAGTTCTGAGT /31ABkFQ/-3' | Probe    |
| <b>(Bim)</b>    | 5'-TGTCTGACTCTGATTCTCGGA-3'                                  | Primer 1 |
|                 | 5'-TGCAATTGTCCACCTTCTCTG-3'                                  | Primer 2 |
| <b>Bid</b>      | 5'-/ 56-FAM/ AGTTCCTTT /Z EN/TGTCTTCCTCCGACAGG /31ABkFQ/-3'  | Probe    |
|                 | 5'-GCCGCACAGTTCATGAATG-3'                                    | Primer 1 |
|                 | 5'-CCTTGTCGTTCTCCATGTCTC-3'                                  | Primer 2 |
| <b>Bak1</b>     | 5'-/56-FAM/CCCGTCCCC/ZEN/TTCTGAACAGCA/31ABkFQ/-3'            | Probe    |
|                 | 5'-AATGGCATCTGGACAAGGAC-3'                                   | Primer 1 |
|                 | 5'-CTTCGAAAGACCTCCTCTGTG-3'                                  | Primer 2 |
| <b>Bax</b>      | 5'-/ 56-FAM/CGTCAGCAA/Z EN/TCA TCCTCTGCAGCT /31ABkFQ/-3'     | Probe    |
|                 | 5'-GGAGATGAACTGGACAGCAAT-3'                                  | Primer 1 |
|                 | 5'-GCCATCAGCAAACATGTCAG-3'                                   | Primer 2 |
| <b>Mc11</b>     | 5'-/ 56-FAM/ AGAGGCTGG /ZEN/GA TGGGTTTGTGG /31ABkFQ/-3'      | Probe    |
|                 | 5'-ACAGATGTTCTTGTAAGGACGA-3'                                 | Primer 1 |
|                 | 5'-CTTCTAGGTCCTGTACGTGGA-3'                                  | Primer 2 |
| <b>Bcl2I2</b>   | 5'-/ 56-FAM/ ACCA TCCAA/Z EN/TCCTGCACTTGTCCC/31ABkFQ/-3'     | Probe    |
| <b>(Bcl-w)</b>  | 5'-TGTGTGCTGAGAGTGTCAAC-3'                                   | Primer 1 |
|                 | 5'-CCGTATAGAGCTGTGAACTCC-3'                                  | Primer 2 |
| <b>Bcl2</b>     | 5'- /56-FAM/CAG ATT GGG /ZEN/TCC TCA CAC TCC GG/31ABkFQ/ -3' | Probe    |
|                 | 5'-TTG TAA TTC ATC TGC CGC CG-3'                             | Forward  |
|                 | 5'- AAT GAA TCG GGA GTT GGG GT -3'                           | Reverse  |
| <b>Acta2</b>    | /5TET/CA GCA CAG C/ZEN/C TGA ATA GCC ACA TAC A/31ABkFQ/ -3'  | Probe    |
|                 | 5'- GAG TCC AGC ACA ATA CCA GTT -3'                          | Forward  |
|                 | 5'- CAC TGA ACC CTA AGG CCA AC -3'                           | Reverse  |
| <b>GusB</b>     | 5'- /56-FAM/ACCTCCAAA/ZEN/TGCCCATAGTCATGATACC/31ABkfq/ -3'   | Probe    |
|                 | 5'- GATGCGTCTTATACCAGTTCTCA -3'                              | Primer 1 |
|                 | 5'- CAACGCCAAATATGATGCAGAC -3'                               | Primer 2 |

**Supplemental Table 4.** Primer sequences used for qPCR.

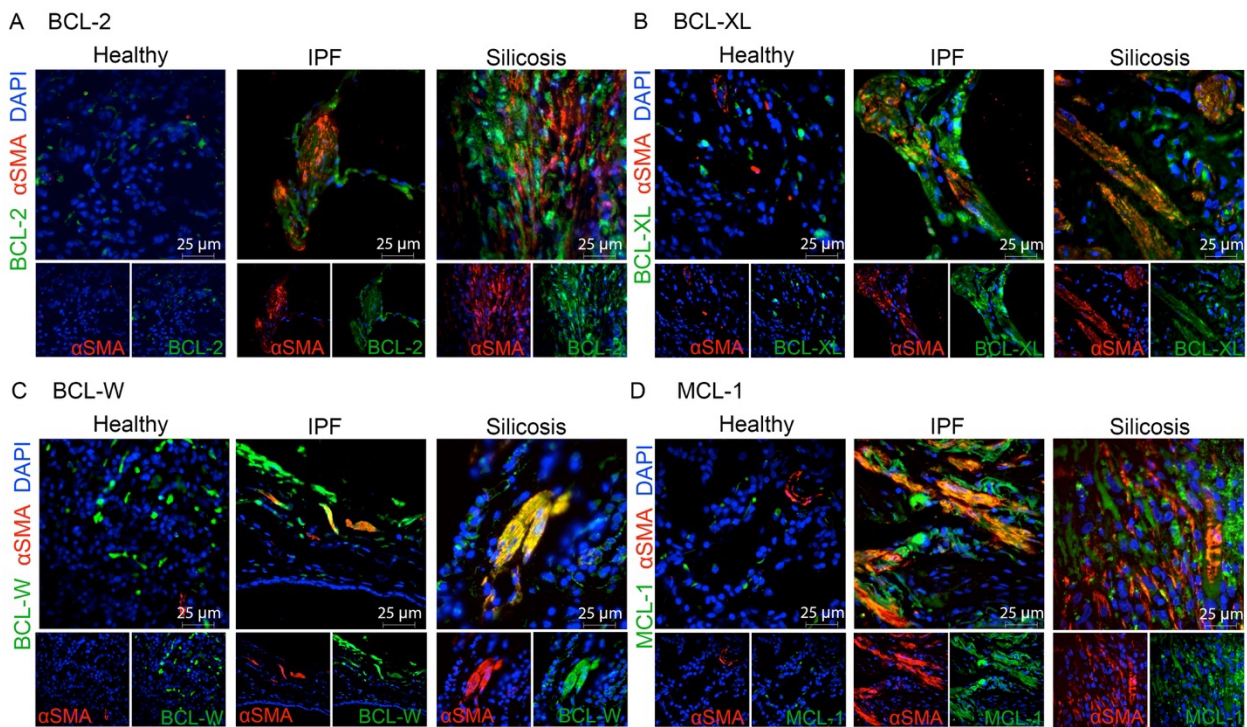

**Supplemental Figure 1.  $\alpha$ SMA+ fibrotic fibroblasts express anti-apoptotic BCL-2 family members in IPF and silicosis (40X images).** Immunofluorescent imaging of lungs from healthy donors, IPF, and silicosis for anti- $\alpha$ SMA (red), DAPI (blue) and anti-apoptotic BCL-2 family members (green) (A) BCL-2, (B) BCL-XL, (C) BCL-W, (D) MCL-1. Total magnification: 400X

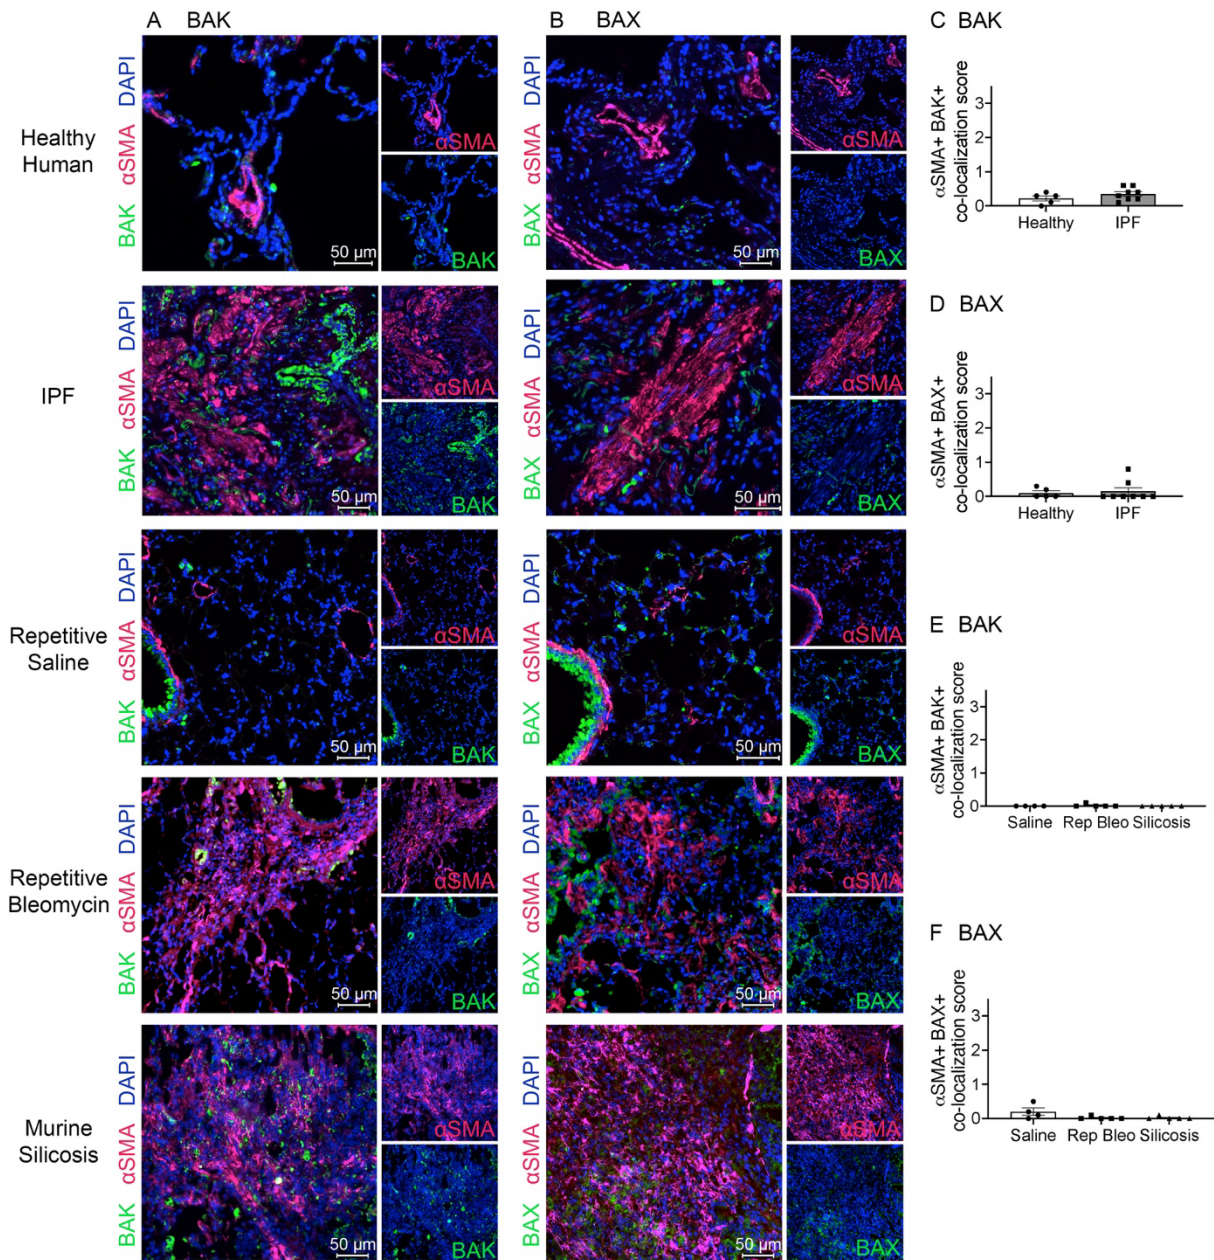

**Supplemental Figure 2.  $\alpha$ SMA<sup>+</sup> fibroblasts do not express significant BAX or BAK in human or murine fibrotic lung disease.** Immunofluorescent imaging of lungs from human (healthy donors, IPF) and mice (repetitive saline, 28-week repetitive bleomycin, and 24-week silicosis). Samples were stained for anti- $\alpha$ SMA (red), DAPI (blue) and pro-apoptotic BCL-2 family members (green) (A) BAK and (B) BAX, with scoring of co-localization within  $\alpha$ SMA<sup>+</sup> cells for BAK in (C) human and (D) mouse and BAX in (E) human and (F) mouse. n=4-8 per group. Semiquantitative scoring of co-localization of BAX or BAK in  $\alpha$ SMA<sup>+</sup> cells: 0 (0%), 1 (1-33%), 2

(34-66%), 3 (67-100%). n=4-8 samples per group. Ten images per slide were scored. Graphed as scatter plot with bar, mean  $\pm$  SEM.  $*P<0.05$ , Brown-Forsythe and Welch's ANOVA with Dunnett correction for multiple comparisons. Total magnification 200X.

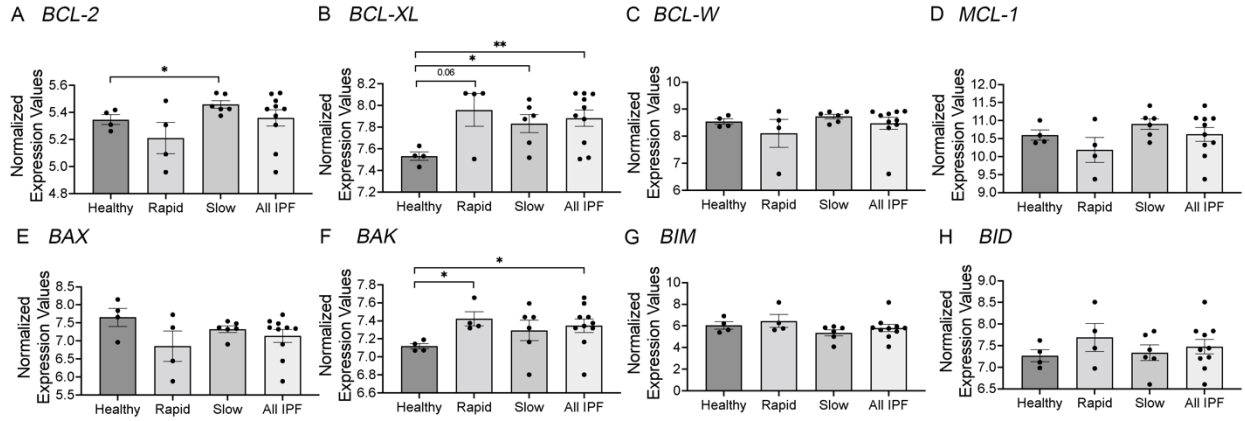

**Supplemental Figure 3. IPF fibrotic fibroblasts have increased expression of *BCL-2*, *BCL-XL*, and *BAK* compared to healthy fibroblasts.** RNA expression as determined by microarray analysis of in vitro cultured primary lung fibroblasts from healthy donors and patients with rapidly progressing and slowly progressing IPF for BCL-2 family members: (A) *BCL-2*, (B) *BCL-XL*, (C) *BCL-W*, (D) *MCL-1*, (E) *BAX*, (F) *BAK*, (G) *BIM*, and (H) *BID*. GSE 44723: Healthy n=4, rapid n=4, slow n=6, all IPF n=10. Graphed as scatter plot with bar, mean  $\pm$  SEM. \* $P < 0.05$ , \*\* $P < 0.01$ , \*\*\* $P < 0.001$ , 2-tailed t-test with Welch's correction.

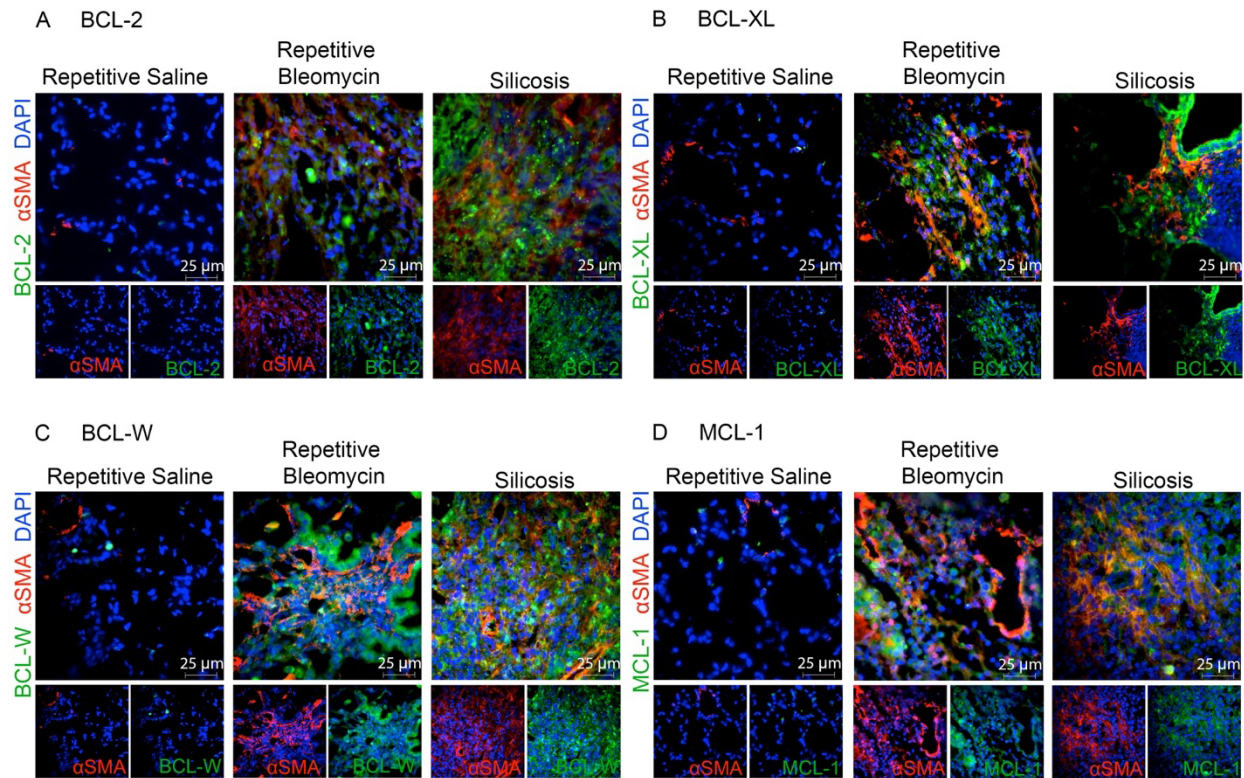

**Supplemental Figure 4. In two pre-clinical models of PF-ILD,  $\alpha$ SMA<sup>+</sup> fibrotic fibroblasts express anti-apoptotic BCL-2 family members (40X).** Immunofluorescent imaging of murine lungs from repetitive saline treated, repetitive bleomycin (28-week), and silicosis (24-week) mice for anti- $\alpha$ SMA (red), DAPI (blue) and anti-apoptotic BCL-2 family members (green) (A) BCL-2, (B) BCL-XL, (C) BCL-W, (D) MCL-1. Total magnification 400X.

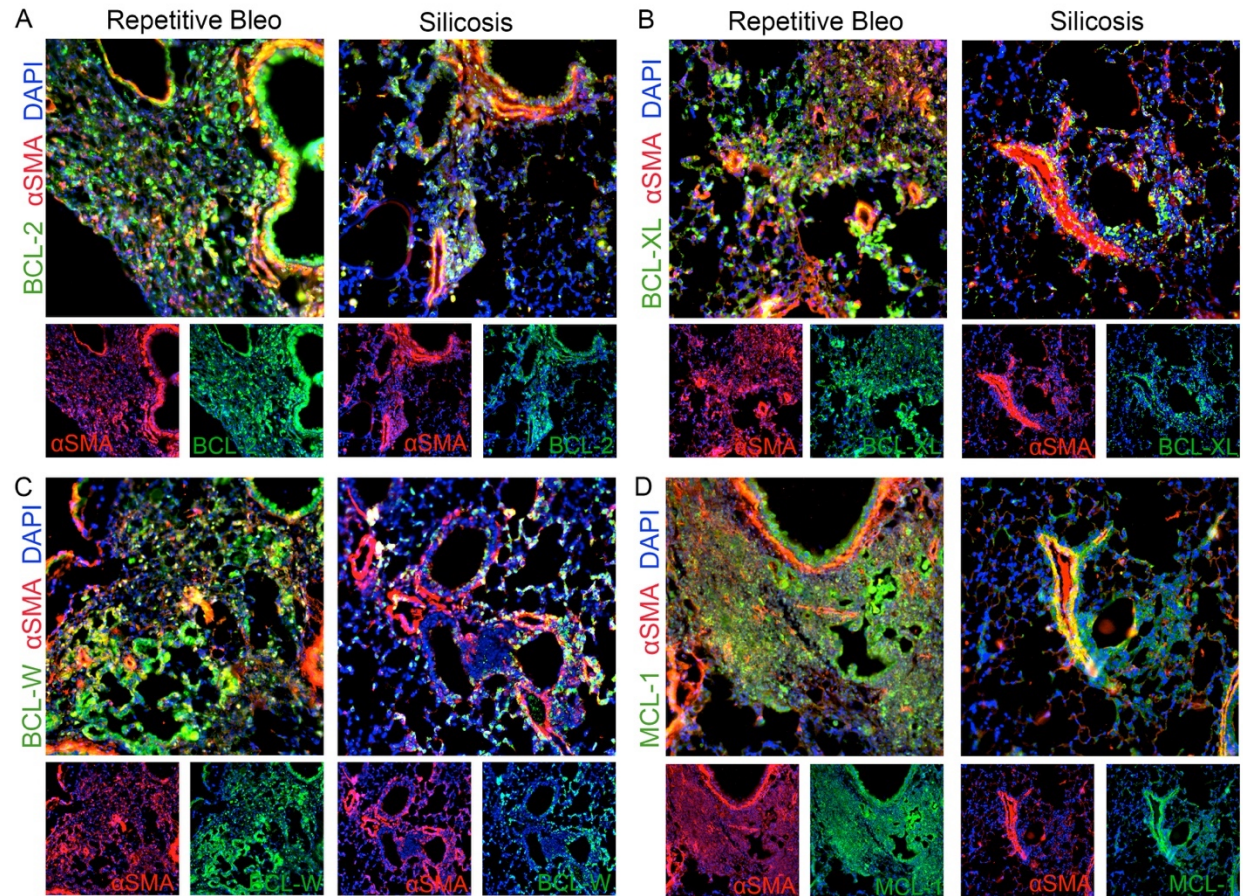

**Supplemental Figure 5. In earlier stages of two murine models of PF-ILD,  $\alpha$ SMA+ fibrotic fibroblasts express anti-apoptotic BCL-2 family members.** Immunofluorescent imaging of murine lungs from naïve, repetitive bleomycin (10-week), and murine silicosis (4-week) for anti- $\alpha$ SMA (red), DAPI (blue) and anti-apoptotic BCL-2 family members (green) (A) BCL-2, (B) BCL-XL, (C) BCL-W, (D) MCL-1. Total magnification 200X.

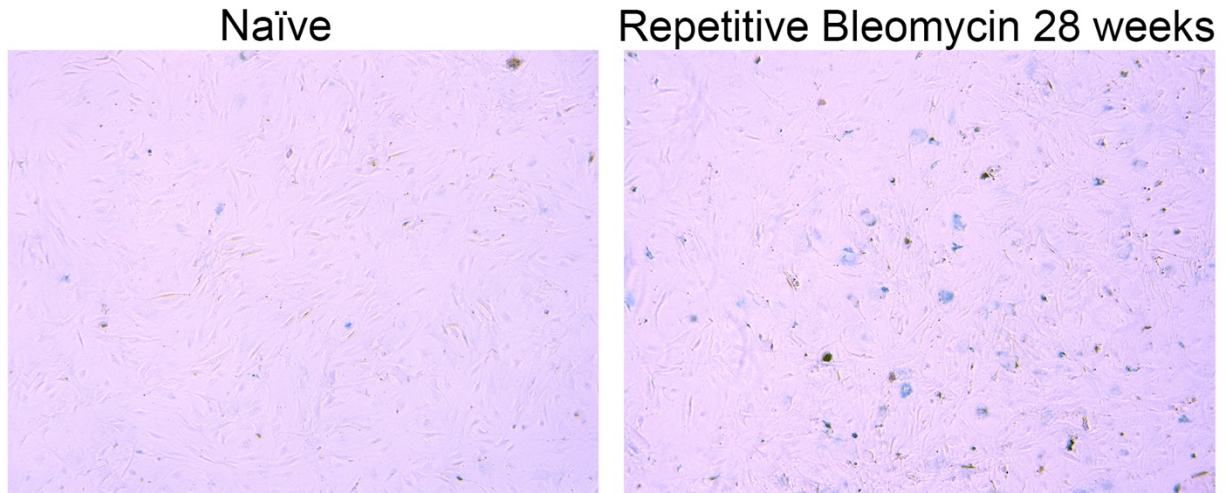

**Supplemental Figure 6. Fibroblasts from repetitive bleomycin treated mice have increased markers of senescence.** Beta-galactosidase staining (blue) of in vitro cultured primary lung fibroblasts from naïve and 28-week repetitive bleomycin mice. Total magnification 50X.

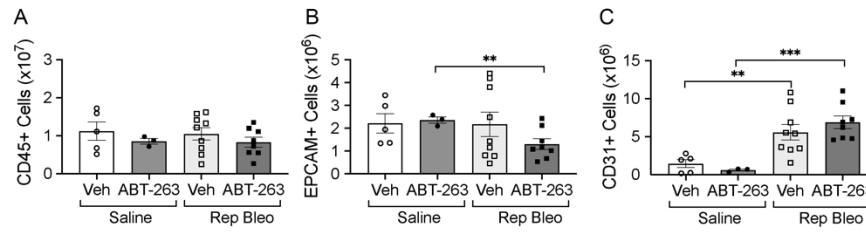

**Supplemental Figure 7. After repetitive bleomycin, treatment with ABT-263 did not alter epithelial cell, endothelial cell, or leukocyte numbers.** Quantification of (A) leukocyte (CD45+), (B) epithelial cell (EPCAM+), and (C) endothelial cell (CD31+) populations by flow cytometry.  $n=3-9$  mice per group. Graphed as scatter plot with bar, mean  $\pm$  SEM. \* $P<0.05$ , \*\* $P<0.01$ , \*\*\* $P<0.001$ , 2-tailed t-test with Welch's correction.

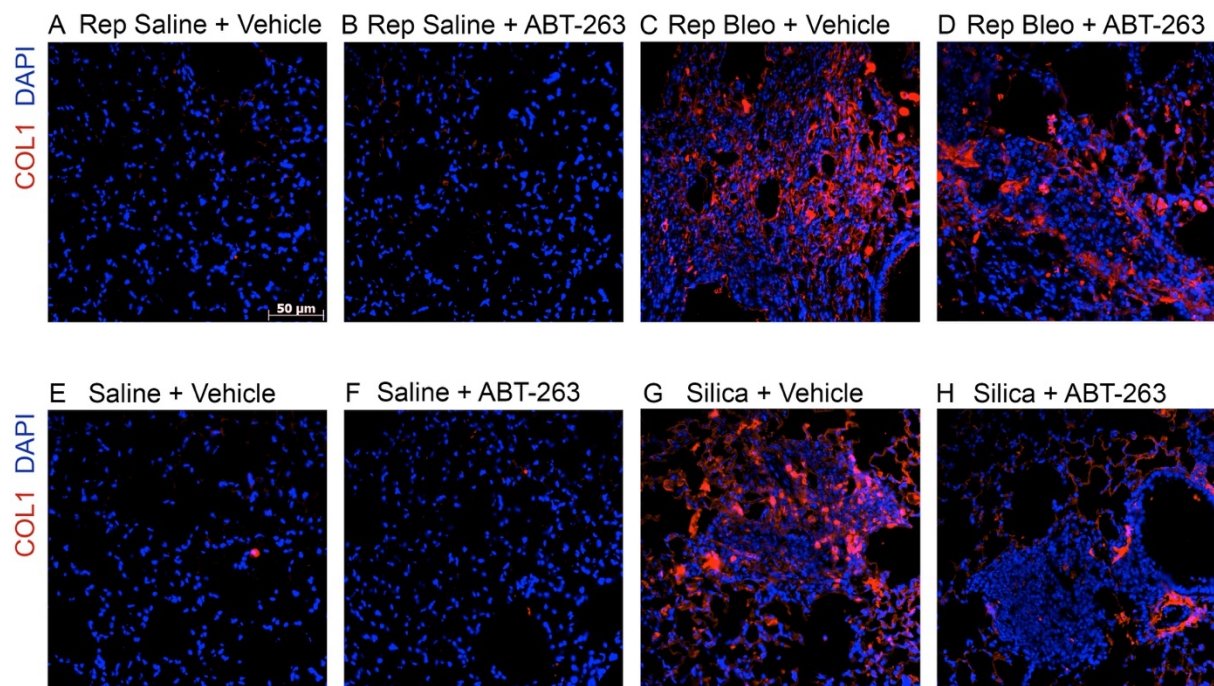

**Supplemental Figure 8. After repetitive bleomycin or silica, treatment with ABT-263 reduces COL1 staining.** Immunofluorescent imaging of murine lungs stained for DAPI (blue) and COL1 (red) after treatment with (A) repetitive saline + vehicle, (B) repetitive saline + ABT-263, (C) repetitive bleomycin + vehicle, (D) repetitive bleomycin + ABT-263, (E) saline + vehicle, (F) saline + ABT-263, (G) silica + vehicle, (H) silica + ABT-263. Total magnification 200X.

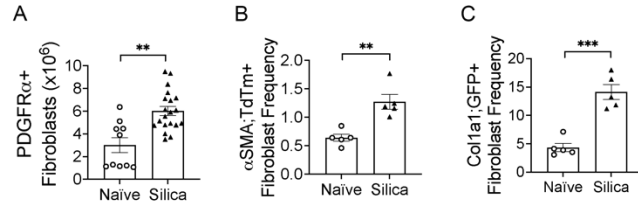

**Supplemental Figure 9. Eight-week silica mice have increased PDGFR $\alpha$ +,  $\alpha$ SMA+, and Col1a1+ fibrotic fibroblasts.** Lin- fibroblasts isolated from  $\alpha$ SMA;TdTm and Col1a1;GFP were quantified by flow cytometry for (A) PDGFR $\alpha$ +, (B)  $\alpha$ SMA;TdTm+, and (C) Col1a1;GFP+ cells. n=5 per group ( $\alpha$ SMA;TdTm and Col1a1;GFP), n=10 per group (PDGFR $\alpha$ ). Graphed as scatter plot with bar, mean  $\pm$  SEM. \* $P$ <0.05, \*\* $P$ <0.01, \*\*\* $P$ <0.001, 2-tailed t-test with Welch's correction.

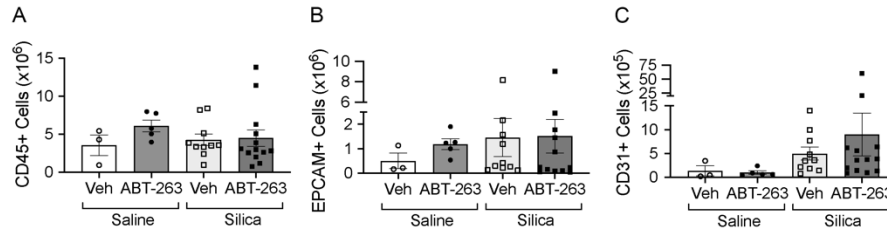

**Supplemental Figure 10. After silica exposure, treatment with ABT-263 did not alter epithelial cell, endothelial cell, or leukocyte numbers.** Quantification of (A) leukocyte (CD45+), (B) epithelial cell (EPCAM+), and (C) endothelial cell (CD31+) populations by flow cytometry.  $n=3-13$  mice per group. Graphed as scatter plot with bar, mean  $\pm$  SEM. \* $P < 0.05$ , \*\* $P < 0.01$ , \*\*\* $P < 0.001$ , 2-tailed t-test with Welch's correction.

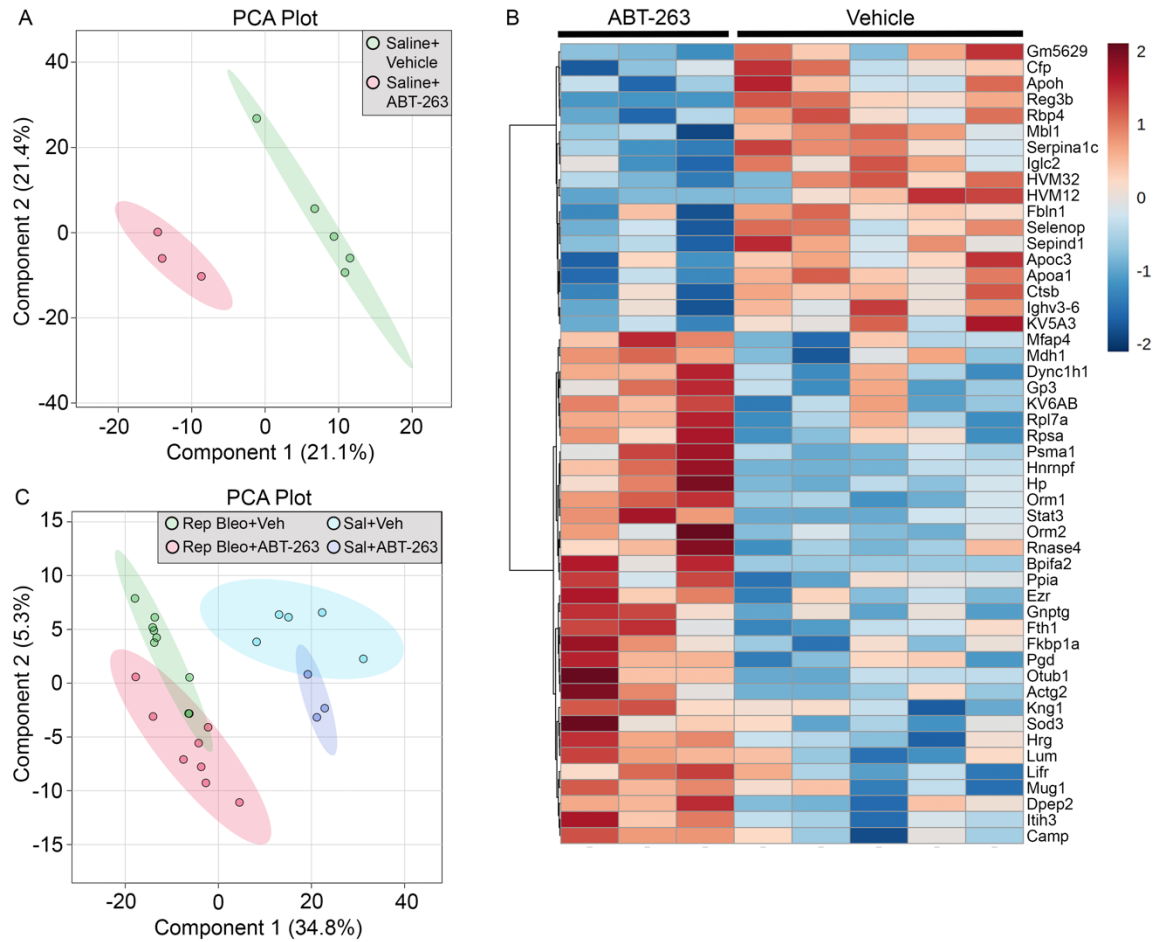

**Supplemental Figure 11. Serum proteomic analysis separates vehicle and ABT-263 treated populations.** PCA of global proteomic patterns between (A) vehicle and ABT-263 treated repetitive saline instilled mice, and (B) vehicle and ABT-263 treated mice after repetitive saline or repetitive bleomycin. (C) Heat map of normalized signal between repetitive saline mice treated with vehicle and ABT-263. n=3-9 mice per group.

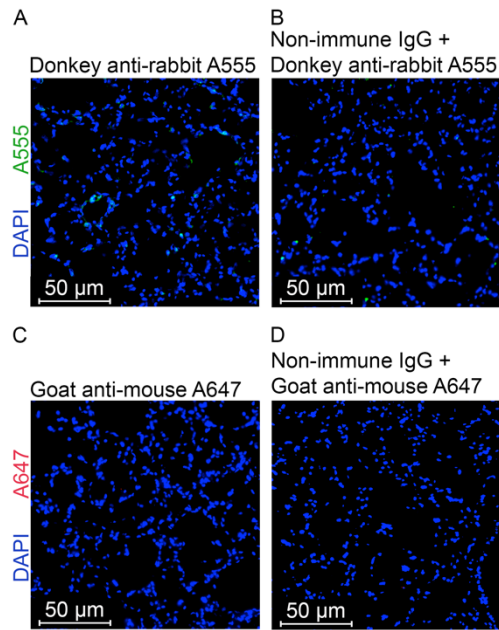

**Supplemental Figure 12. Negative controls for immunofluorescent imaging.**

Immunofluorescent imaging of lungs from naïve mice treated with DAPI (blue) and (A) secondary donkey anti-rabbit A555, (B) non-immune IgG with secondary donkey anti-rabbit A555, (C) secondary goat anti-mouse A647 and (D) non-immune IgG with secondary goat anti-mouse A647. Total magnification 200X.

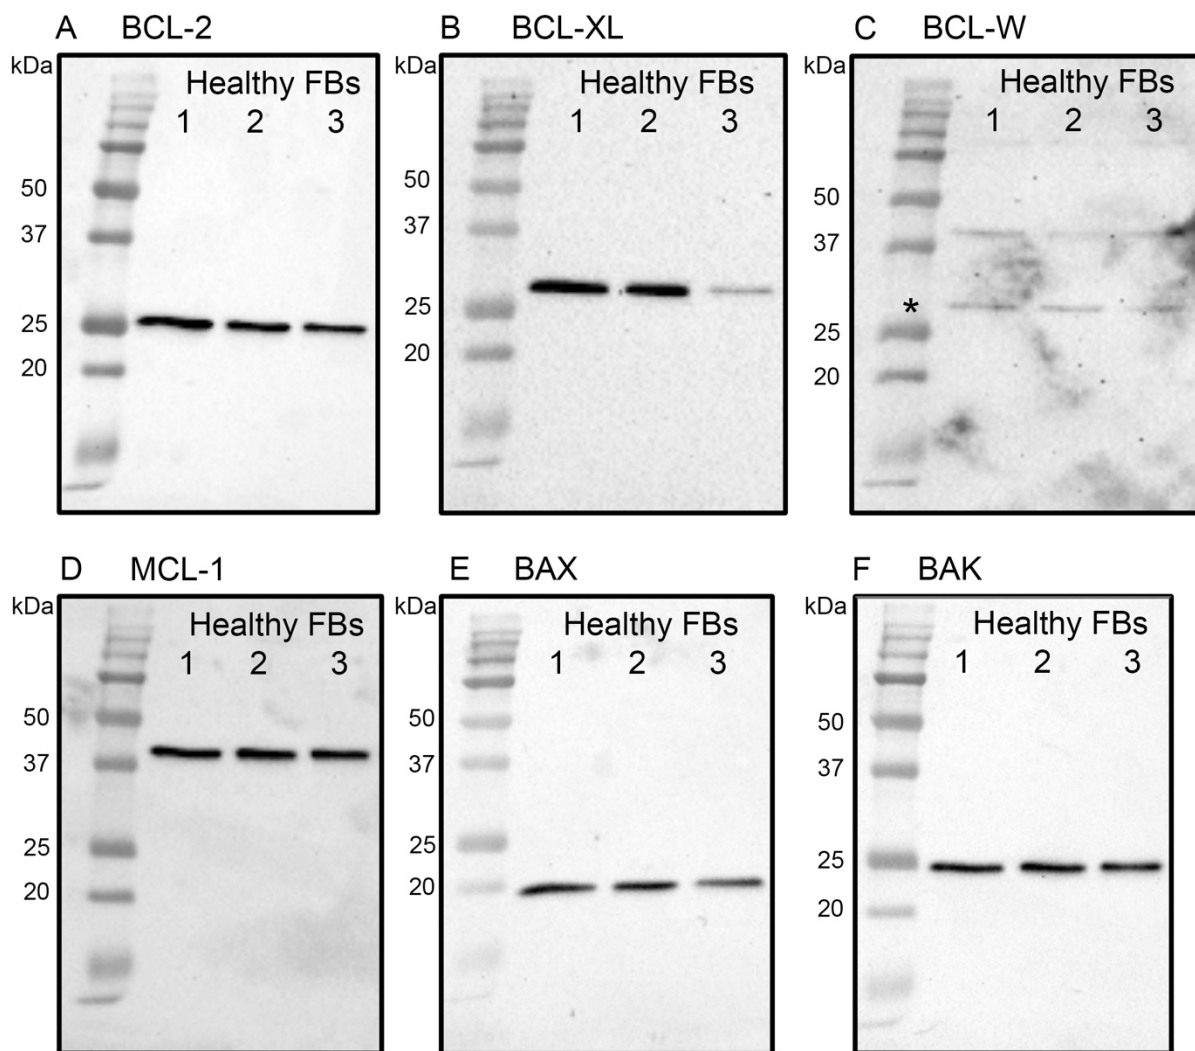

**Supplemental Figure 13.** Western blots from healthy human fibroblasts grown in vitro for (A) BCL-2, (B) BCL-XL, (C) BCL-W, (D) MCL-1, (E) BAX and (F) BAK.

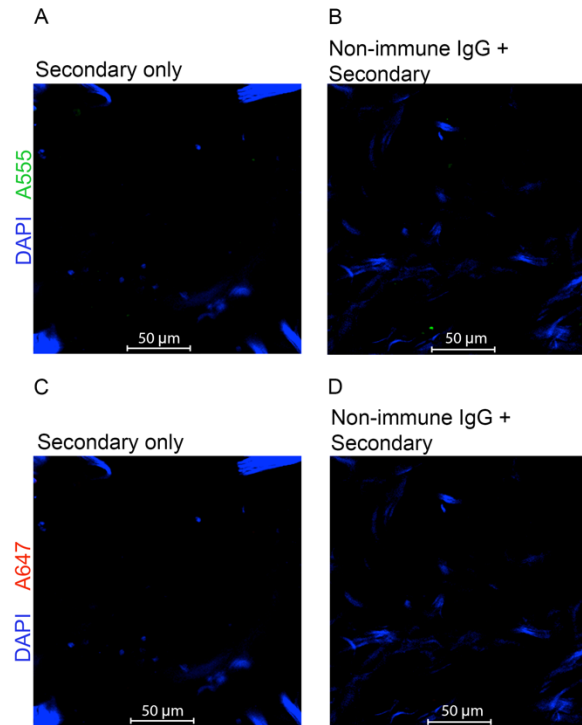

**Supplemental Figure 14. Negative controls for precision cut lung slices.** Immunofluorescent images of precision cut lung slices from an IPF lung stained with DAPI (blue), secondary donkey anti-rabbit A555 (green), secondary goat anti-mouse A647 without (A,C) and with (B,D) non-immune IgG. Total magnification 200X.
